# Supplementary material for: A novel metal–organic framework of Ba–hemin with enhanced cascade activity for sensitive glucose detection
Source: Royal Society of Chemistry journal article supplement (doi:10.1039/d2ra02778j), 2022-01-01

## Supporting Information

# A novel metal-organic framework of Ba-hemin with enhanced cascade activity for sensitive glucose detection

Jintao Yi<sup>\*a</sup>, Xianqin Han<sup>a</sup>, Fengying Gao<sup>a</sup>, Le Cai<sup>a</sup>, Ying Chen<sup>a</sup>, Xiulong Deng<sup>a</sup>, Xun Li<sup>\*a</sup>, Jun Xue<sup>\*a</sup> and Hui Zhou<sup>\*ab</sup>

<sup>a</sup>Key Laboratory of Organo-Pharmaceutical Chemistry of Jiangxi Province, Gannan Normal University, Ganzhou 341000, P. R. China

<sup>b</sup>Guangdong Provincial Key Laboratory of Research and Development of Natural Drugs, and School of Pharmacy, Guangdong Medical University, Dongguan 523808, PR China

E-mail: [yistarthappy@163.com](mailto:yistarthappy@163.com); Fax: (+86)797-8393536; Tel: +86-797-8393536

**Table S1** A comparison of the analytical performance of Ba-hemin@GOX using other colorimetric sensors for glucose detection.

| Materials                                | Linear range for glucose (M)              | Detection limit for glucose ( $\mu$ M) | Reference |
|------------------------------------------|-------------------------------------------|----------------------------------------|-----------|
| Fe <sub>3</sub> O <sub>4</sub> particles | $5 \times 10^{-5} - 1 \times 10^{-3}$     | 30                                     | 26        |
| Cellulose-strips                         | $1 \times 10^{-3} - 1.1 \times 10^{-2}$   | 450                                    | 27        |
| Graphene aerogel                         | $1 \times 10^{-3} - 1.8 \times 10^{-2}$   | 870                                    | 28        |
| Silicon-GOX                              | $1 \times 10^{-3} - 1.5 \times 10^{-2}$   | 330                                    | 29        |
| MOF-808                                  | $5.7 \times 10^{-6} - 1.7 \times 10^{-3}$ | 5.7                                    | 30        |
| Ba-hemin@GOX                             | $9.3 \times 10^{-6} - 7.4 \times 10^{-4}$ | 3.1                                    | This work |

**Table S2** Results of the detection of glucose in tap water, serum and drink.

| Sample    | Added (mM) | Founded (mM) | Recovery (%) | RSD (% , n=3) |
|-----------|------------|--------------|--------------|---------------|
| Tap water | 0.037      | 0.041        | 110.8        | 3.6           |
|           | 0.074      | 0.075        | 101.4        | 4.2           |
|           | 0.185      | 0.189        | 102.2        | 2.9           |
|           | 0.370      | 0.387        | 104.6        | 5.3           |
|           | 0.555      | 0.572        | 103.1        | 1.6           |
|           | 0.740      | 0.681        | 92.0         | 4.8           |
| Serum     | 0.037      | 0.035        | 94.6         | 1.5           |
|           | 0.074      | 0.077        | 104.1        | 3.1           |
|           | 0.185      | 0.192        | 103.8        | 4.6           |
|           | 0.370      | 0.397        | 107.3        | 5.4           |
|           | 0.555      | 0.547        | 98.6         | 3.6           |
|           | 0.740      | 0.739        | 99.9         | 2.8           |
| Drink     | 0.037      | 0.037        | 100.0        | 3.2           |
|           | 0.074      | 0.075        | 101.4        | 4.5           |
|           | 0.185      | 0.192        | 103.8        | 1.9           |
|           | 0.370      | 0.357        | 96.5         | 5.3           |
|           | 0.555      | 0.556        | 100.2        | 2.6           |
|           | 0.740      | 0.755        | 102.0        | 3.8           |

**Fig.S1** The synthesis optimization of Ba-hemin with different molar ratios, (A) The illustration of the synthesis of Ba-hemin, (B) The SEM images.

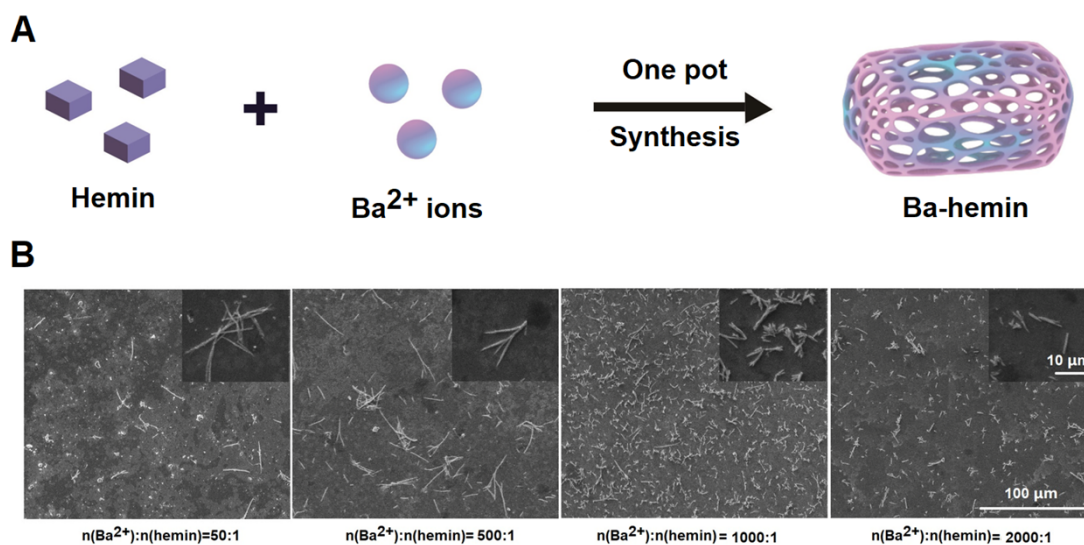

**Fig.S2** The UV-vis absorbance spectrum of Ba-hemin.

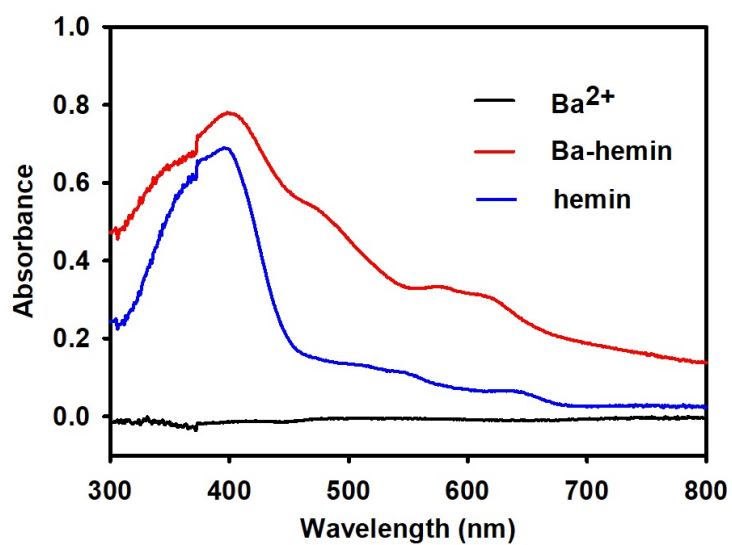

**Fig.S3** The peroxidase-like catalytic activity detection of Ba-hemin with the different concentrations of  $H_2O_2$ . (A) The UV-vis absorbance spectrum, (B) The corresponding double reciprocal plot.

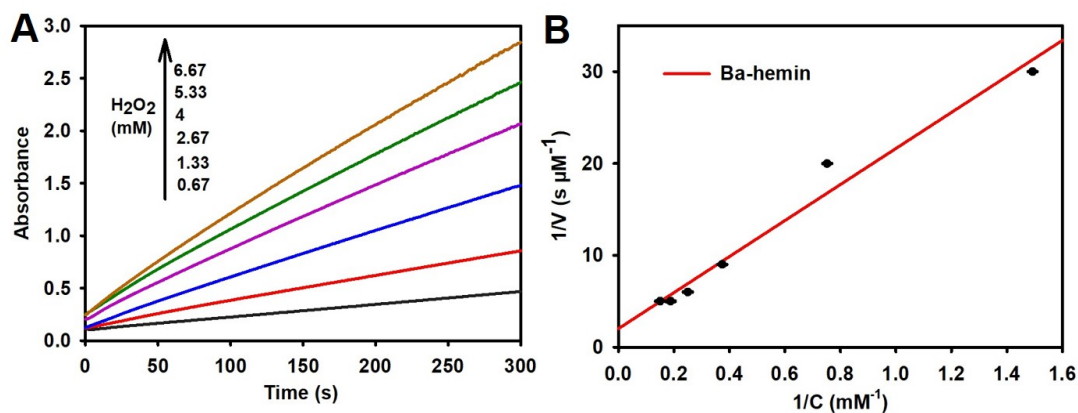

**Fig.S4** The peroxidase activity detection of horseradish peroxidase (HRP) with the different concentrations of  $H_2O_2$ . (A) The UV-vis absorbance spectrum, (B) The corresponding double reciprocal plot.

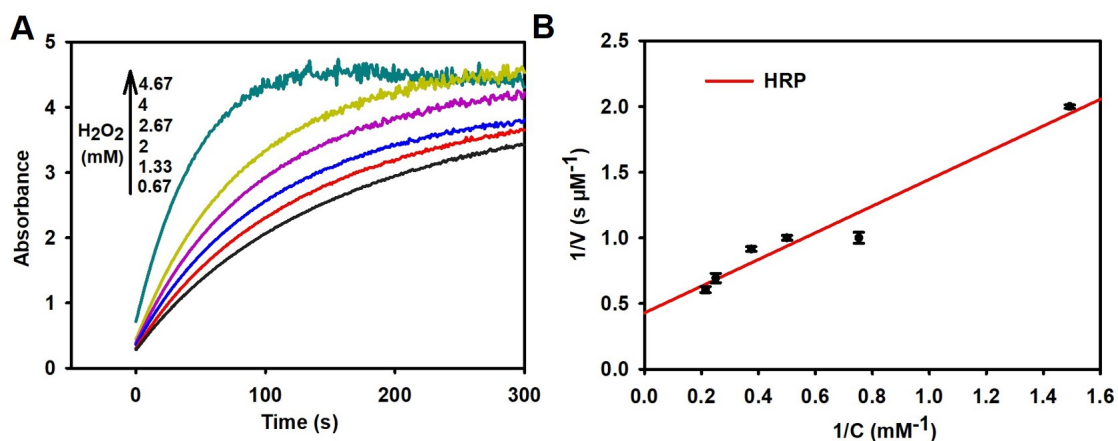

**Fig.S5** The TGA of Ba-hemin and Ba-hemin@GOX.

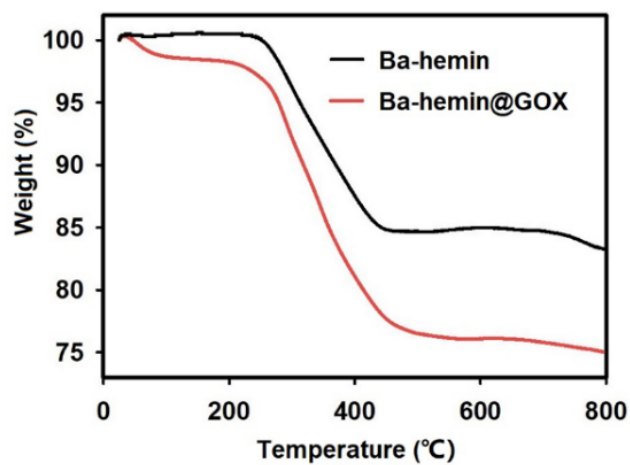

**Fig.S6** The FTIR spectras of GOX, Ba-hemin@GOX, Ba-hemin/GOX, Ba-hemin/GOX+SDS, Ba-hemin.

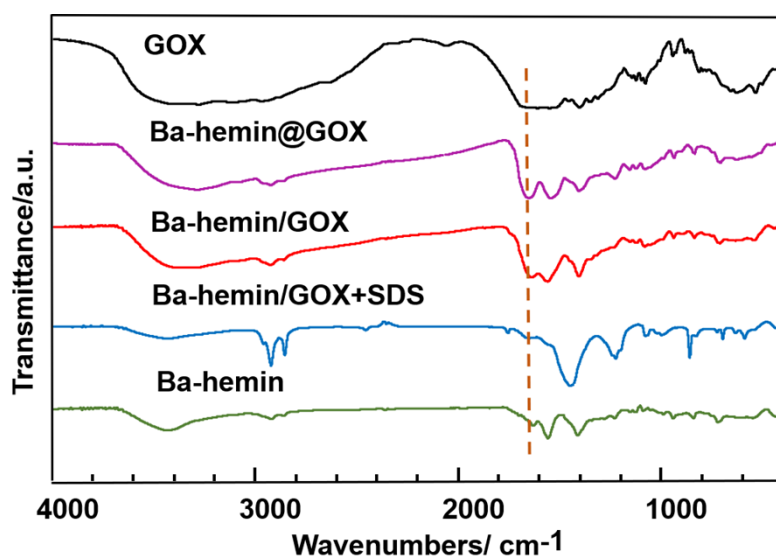

**Fig.S7** The fluorescence intensity detections of the Ba-hemin@FITC-GOX and the unreacted FITC-GOX.

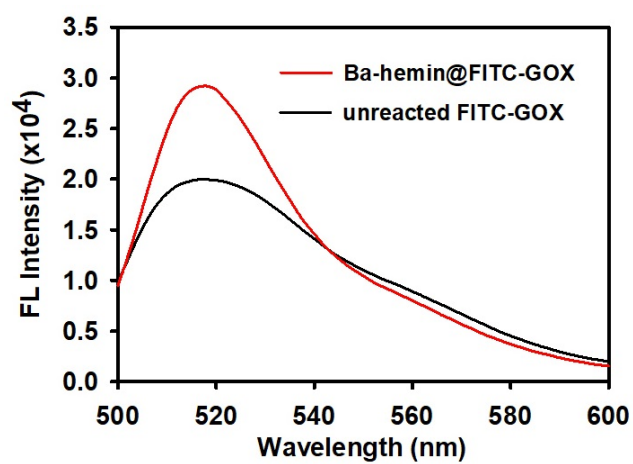

**Fig.S8** The double reciprocal plots of the activity of (A) free GOX and (B) Ba-hemin@GOX with the concentration of glucose.

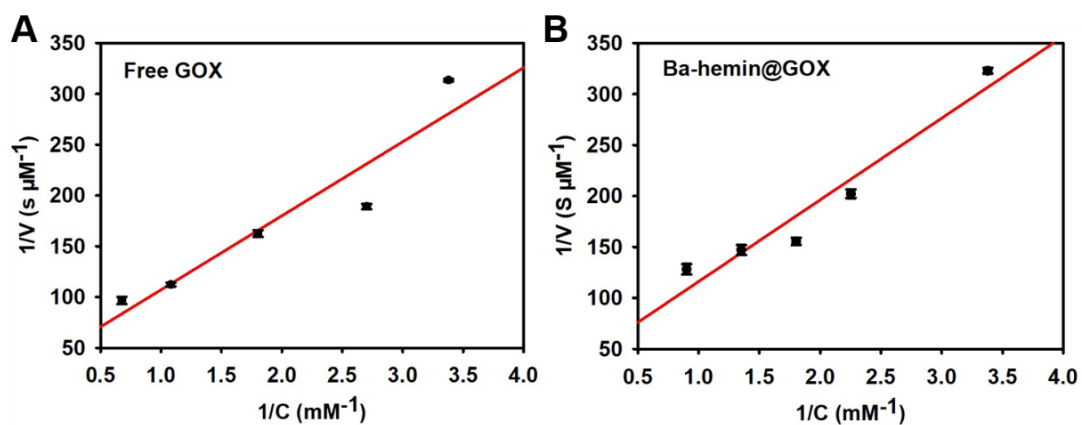

**Fig.S9** The effect of (A) temperature and (B) pH on the activity of Ba-hemin@GOX (red line) and free GOX (black line). The error bars represent the standard deviation of three measurements.

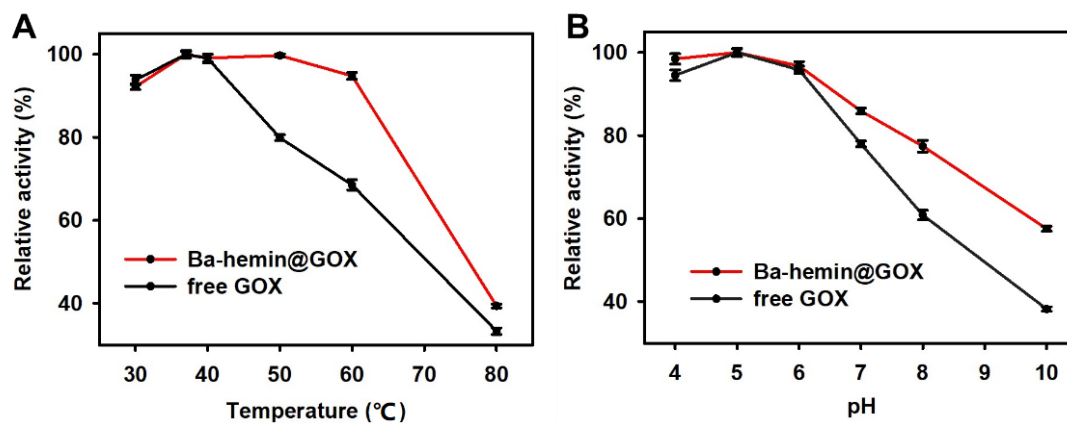

**Fig.S10** The storage stability of Ba-hemin@GOX with different days.

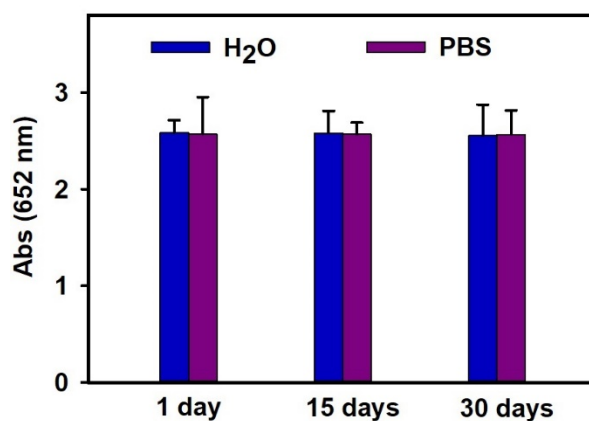

Supplement: d2ra02778j1.pdf [file d2ra02778j1.pdf]
